# Supplementary material
Source: Springer Nature journal article supplement (https://www.springermedizin.de/resource/supplementary/12889_2012_5112_MOESM1_ESM.pdf/9494616)

**Reported Walking 0 Months at Baseline**

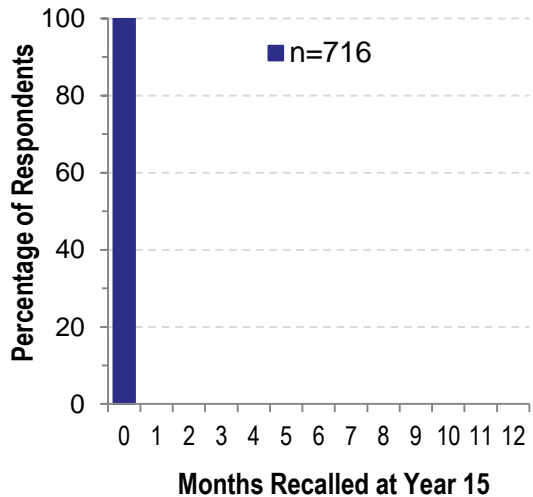

**Reported Walking 1-3 Months at Baseline**

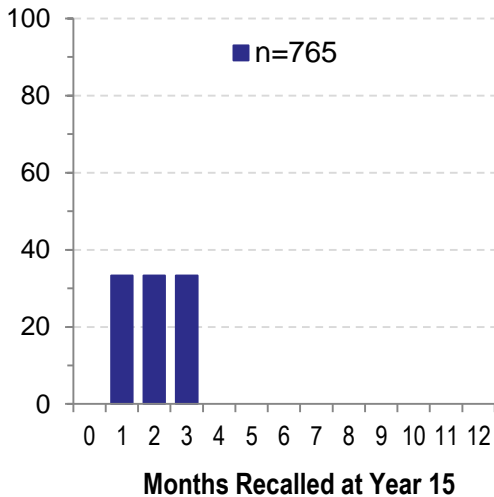

**Reported Walking 4-6 Months at Baseline**

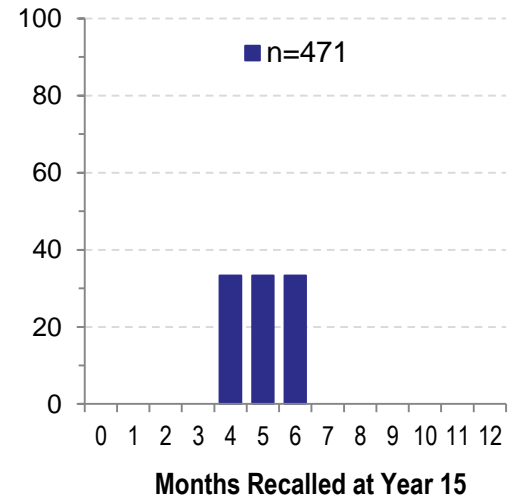

**Reported Walking 7-9 Months at Baseline**

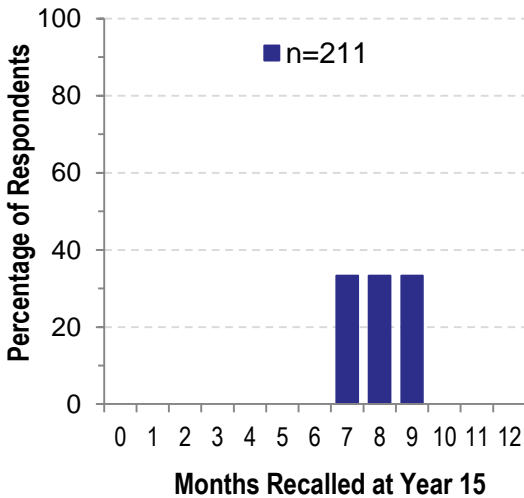

**Reported Walking 10-12 Months at Baseline**

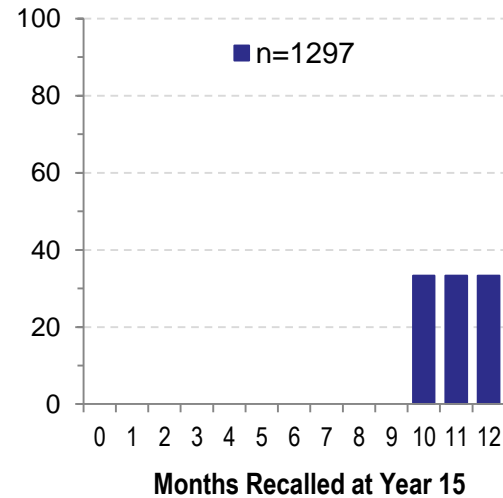

Supplement: MOESM1 [file 9494616]
